# Supplementary material
Source: HighWire-hosted journal article supplement (https://jhr.uwpress.org/highwire/filestream/1584/field_highwire_adjunct_files/0/JHRv53n01_article04_FernandexNuevo-ChiqueroLehmann_OnlineApp.pdf)
Supplement: JHRv53n01_article04_FernandexNuevo-ChiqueroLehmann_OnlineApp.pdf [file JHRv53n01_article04_FernandexNuevo-ChiqueroLehmann_OnlineApp.pdf]

**Appendix (for on-line publication only)**

Figure A.1. Birth Order Effects in Cognitive and Non-Cognitive Indices

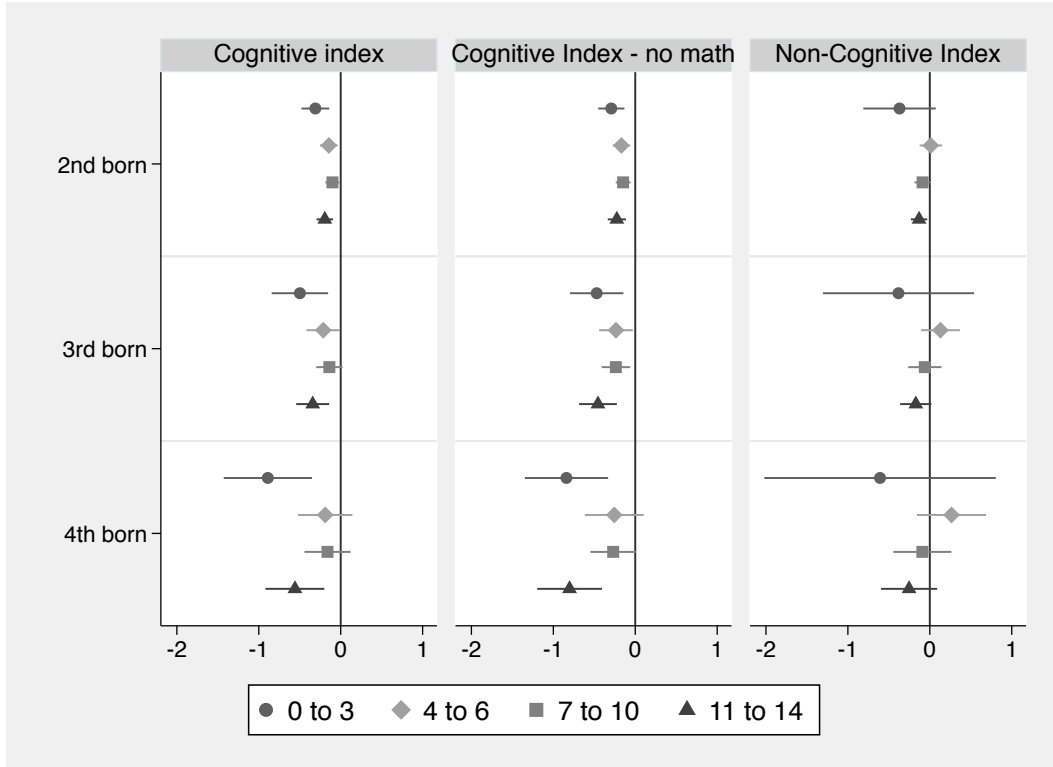

Figure A.2. Birth Order Effects in HOME Scores

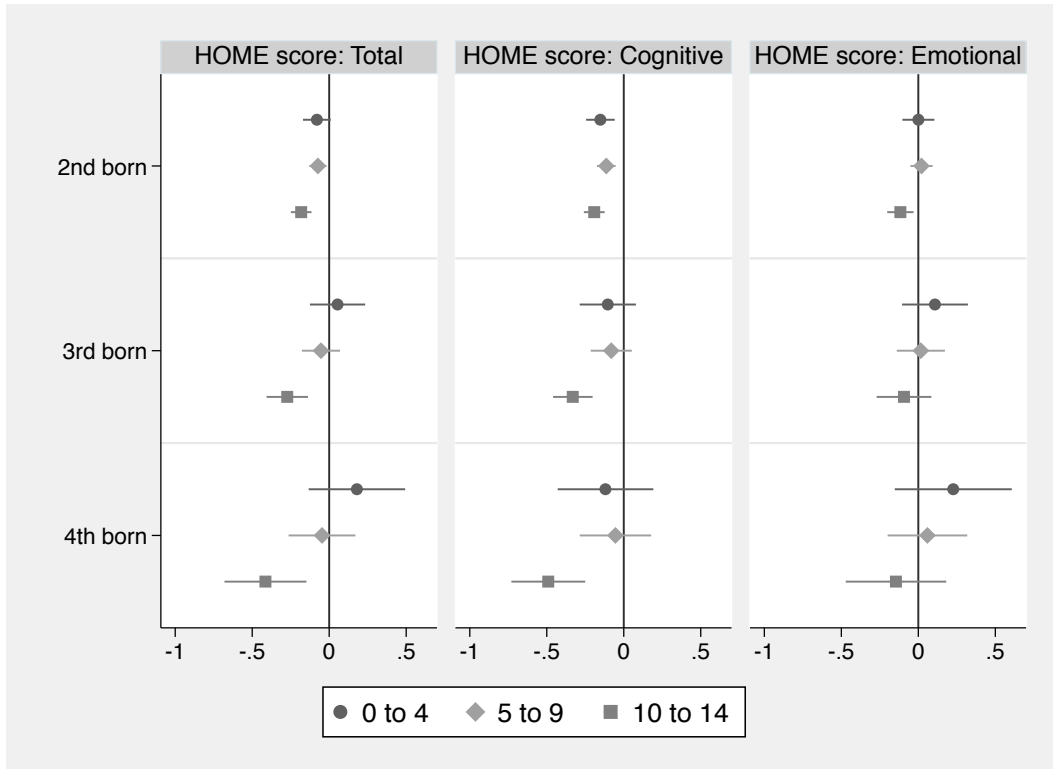

Table A.1 Birth Order Differences in Difficult Temperament and Behavior Problem Index

| Difficult Temperament Index                       |                      |                      |                      |                      |                      |                      |                      |
|---------------------------------------------------|----------------------|----------------------|----------------------|----------------------|----------------------|----------------------|----------------------|
| Family size                                       | Up to 4              |                      | Up to 4 children     |                      | 2 children           | 3 children           | 4 children           |
|                                                   | (1)                  | (2)                  | (3)                  | (4)                  | (5)                  | (6)                  | (7)                  |
| 2 <sup>nd</sup> Born                              | -0.161***<br>(0.055) | -0.170*<br>(0.090)   | -0.173*<br>(0.089)   | -0.333<br>(0.203)    | -0.555<br>(0.355)    | 0.284<br>(0.284)     | -0.639*<br>(0.346)   |
| 3 <sup>rd</sup> Born                              | -0.205**<br>(0.093)  | -0.005<br>(0.175)    | -0.011<br>(0.173)    | -0.344<br>(0.424)    |                      | 1.023*<br>(0.576)    | -1.158*<br>(0.697)   |
| 4 <sup>th</sup> Born                              | -0.369**<br>(0.162)  | -0.024<br>(0.308)    | -0.044<br>(0.308)    | -0.547<br>(0.649)    |                      |                      | -1.624<br>(1.077)    |
| Children                                          | 2471                 | 2471                 | 2471                 | 2471                 | 1142                 | 890                  | 439                  |
| Behavioral Problem Index                          |                      |                      |                      |                      |                      |                      |                      |
| Family size                                       | Up to 4              |                      | Up to 4 children     |                      | 2 children           | 3 children           | 4 children           |
|                                                   | (1)                  | (2)                  | (3)                  | (4)                  | (5)                  | (6)                  | (7)                  |
| 2 <sup>nd</sup> Born                              | 0.007<br>(0.039)     | -0.005<br>(0.041)    | -0.010<br>(0.040)    | -0.013<br>(0.040)    | 0.027<br>(0.069)     | -0.111*<br>(0.058)   | -0.056<br>(0.100)    |
| 3 <sup>rd</sup> Born                              | 0.129<br>(0.081)     | 0.101<br>(0.082)     | 0.095<br>(0.082)     | 0.079<br>(0.081)     |                      | 0.035<br>(0.114)     | 0.022<br>(0.137)     |
| 4 <sup>th</sup> Born                              | 0.271*<br>(0.151)    | 0.116<br>(0.146)     | 0.109<br>(0.146)     | 0.085<br>(0.142)     |                      |                      | 0.014<br>(0.188)     |
| N                                                 | 4628                 | 4628                 | 4628                 | 4628                 | 2025                 | 1764                 | 839                  |
| Self-Perception Profile for Children – General    |                      |                      |                      |                      |                      |                      |                      |
| Family size                                       | Up to 4              |                      | Up to 4 children     |                      | 2 children           | 3 children           | 4 children           |
|                                                   | (1)                  | (2)                  | (3)                  | (4)                  | (5)                  | (6)                  | (7)                  |
| 2 <sup>nd</sup> Born                              | -0.088*<br>(0.046)   | -0.140***<br>(0.053) | -0.137**<br>(0.053)  | -0.155***<br>(0.053) | -0.172*<br>(0.096)   | -0.144*<br>(0.079)   | -0.080<br>(0.110)    |
| 3 <sup>rd</sup> Born                              | -0.069<br>(0.081)    | -0.161<br>(0.100)    | -0.157<br>(0.100)    | -0.214**<br>(0.102)  |                      | -0.131<br>(0.134)    | -0.067<br>(0.172)    |
| 4 <sup>th</sup> Born                              | -0.002<br>(0.156)    | -0.079<br>(0.188)    | -0.081<br>(0.188)    | -0.174<br>(0.195)    |                      |                      | -0.252<br>(0.293)    |
| Children                                          | 3794                 | 3794                 | 3794                 | 3794                 | 1629                 | 1461                 | 704                  |
| Self-Perception Profile for Children - Scholastic |                      |                      |                      |                      |                      |                      |                      |
| Family size                                       | Up to 4              |                      | Up to 4 children     |                      | 2 children           | 3 children           | 4 children           |
|                                                   | (1)                  | (2)                  | (3)                  | (4)                  | (5)                  | (6)                  | (7)                  |
| 2 <sup>nd</sup> Born                              | -0.213***<br>(0.052) | -0.289***<br>(0.063) | -0.286***<br>(0.064) | -0.283***<br>(0.064) | -0.336***<br>(0.104) | -0.343***<br>(0.094) | -0.065<br>(0.120)    |
| 3 <sup>rd</sup> Born                              | -0.282***<br>(0.087) | -0.486***<br>(0.115) | -0.485***<br>(0.115) | -0.471***<br>(0.115) |                      | -0.430**<br>(0.168)  | -0.473***<br>(0.180) |
| 4 <sup>th</sup> Born                              | -0.218<br>(0.156)    | -0.385*<br>(0.200)   | -0.388*<br>(0.199)   | -0.365*<br>(0.201)   |                      |                      | -0.668**<br>(0.277)  |
| Children                                          | 3794                 | 3794                 | 3794                 | 3794                 | 1629                 | 1461                 | 704                  |
| Mother FE                                         | N                    | Y                    | Y                    | Y                    | Y                    | Y                    | Y                    |
| Maternal controls                                 | N                    | N                    | Y                    | Y                    | Y                    | Y                    | Y                    |
| Family controls                                   | N                    | N                    | N                    | Y                    | Y                    | Y                    | Y                    |

Notes: All regressions are weighted to account for oversampling of minorities and include mother fixed effects. Standard errors clustered at the family level are in parentheses. \* denotes significance at 10 percent, \*\* at 5 percent, \*\*\* at 1 percent. Sample is restricted to children with complete prenatal input information and from non-twin families. All assessments are age-standardized scores that have been renormalized to have a mean of 0 and a standard deviation of 1. All specifications control for regional dummies, maternal age and its quadratic, gender of the child, age difference with oldest and precedent sibling, age of the child at assessment, and a series of cohort dummies. Mother controls include average per capita lifetime family income and employment status year after birth (employed, unemployed, out of labor force, or in active force) and highest grade completed at the child's birth. Family controls include presence of father figure and family size measured at the time of the assessment.

Table A.2 Birth Order Differences in Difficult Temperament and Behavior Problem Index

| Ages                 | DTI                  |                     | Behavioral Problem Index |                      |
|----------------------|----------------------|---------------------|--------------------------|----------------------|
|                      | 0 to 3               | 4 to 6              | 7 to 10                  | 11 to 14             |
|                      | (1)                  | (2)                 | (3)                      | (4)                  |
| 2 <sup>nd</sup> Born | -0.333<br>(0.203)    | 0.008<br>(0.063)    | -0.065<br>(0.050)        | -0.023<br>(0.054)    |
| 3 <sup>rd</sup> Born | -0.344<br>(0.424)    | 0.112<br>(0.109)    | -0.007<br>(0.098)        | 0.054<br>(0.113)     |
| 4 <sup>th</sup> Born | -0.547<br>(0.649)    | 0.236<br>(0.193)    | -0.033<br>(0.171)        | -0.036<br>(0.205)    |
| Children             | 2471                 | 3858                | 4208                     | 3824                 |
| Ages                 | SPPC - General       |                     | SPPC - Scholastic        |                      |
|                      | 8 to 10              | 11 to 14            | 8 to 10                  | 11 to 14             |
|                      | (1)                  | (2)                 | (3)                      | (4)                  |
| 2 <sup>nd</sup> Born | -0.459***<br>(0.124) | -0.125**<br>(0.061) | -0.349***<br>(0.130)     | -0.301***<br>(0.071) |
| 3 <sup>rd</sup> Born | -0.717**<br>(0.280)  | -0.138<br>(0.123)   | -0.253<br>(0.277)        | -0.517***<br>(0.133) |
| 4 <sup>th</sup> Born | -0.886*<br>(0.458)   | -0.091<br>(0.229)   | -0.350<br>(0.501)        | -0.340<br>(0.231)    |
| Children             | 2203                 | 3516                | 2203                     | 3516                 |
| Mother FE            | Y                    | Y                   | Y                        | Y                    |
| Maternal controls    | Y                    | Y                   | Y                        | Y                    |
| Family controls      | Y                    | Y                   | Y                        | Y                    |

Notes: All regressions are weighted to account for oversampling of minorities and include mother fixed effects. Standard errors clustered at the family level are in parentheses. \* denotes significance at 10 percent, \*\* at 5 percent, \*\*\* at 1 percent. Sample is restricted to children with complete prenatal input information and from non-twin families. All assessments are age-standardized scores that have been renormalized to have a mean of 0 and a standard deviation of 1. All specifications control for maternal age and its quadratic, gender of the child, age difference with oldest and precedent sibling, age of the child at assessment, and regional and cohort dummies. Mother controls include average per capita lifetime family income and employment status year after birth (employed, unemployed, out of labor force, or in active force) and highest grade completed at the child's birth. Family controls include presence of father figure and family size measured at the time of the assessment.

Table A.3 Birth Outcomes

|                      | Gestational length (weeks)    |                     |                     |                     | Born premature (<37 weeks)  |                   |                   |                    |
|----------------------|-------------------------------|---------------------|---------------------|---------------------|-----------------------------|-------------------|-------------------|--------------------|
|                      | (1)                           | (2)                 | (3)                 | (4)                 | (5)                         | (6)               | (7)               | (8)                |
| 2 <sup>nd</sup> Born | -0.036<br>(0.100)             | -0.017<br>(0.125)   | -0.011<br>(0.124)   | -0.026<br>(0.125)   | -0.012<br>(0.021)           | -0.022<br>(0.025) | -0.022<br>(0.025) | -0.020<br>(0.026)  |
| 3 <sup>rd</sup> Born | 0.114<br>(0.177)              | -0.040<br>(0.224)   | -0.036<br>(0.222)   | -0.062<br>(0.230)   | -0.021<br>(0.037)           | -0.002<br>(0.044) | -0.001<br>(0.044) | 0.005<br>(0.046)   |
| 4 <sup>th</sup> Born | -0.059<br>(0.343)             | -0.221<br>(0.429)   | -0.217<br>(0.426)   | -0.257<br>(0.443)   | 0.043<br>(0.070)            | 0.067<br>(0.082)  | 0.066<br>(0.081)  | 0.073<br>(0.085)   |
|                      | Birth weight (oz)             |                     |                     |                     | Low birth weight (<5.5 lbs) |                   |                   |                    |
|                      | (1)                           | (2)                 | (3)                 | (4)                 | (5)                         | (6)               | (7)               | (8)                |
| 2 <sup>nd</sup> Born | 3.778***<br>(0.974)           | 4.269***<br>(0.892) | 4.250***<br>(0.901) | 4.296***<br>(0.915) | 0.003<br>(0.012)            | -0.015<br>(0.012) | -0.015<br>(0.012) | -0.012<br>(0.012)  |
| 3 <sup>rd</sup> Born | 4.976**<br>(1.991)            | 4.396**<br>(1.907)  | 4.375**<br>(1.902)  | 4.481**<br>(1.918)  | -0.006<br>(0.022)           | -0.025<br>(0.024) | -0.025<br>(0.024) | -0.016<br>(0.025)  |
| 4 <sup>th</sup> Born | 4.070<br>(3.336)              | 3.015<br>(3.067)    | 2.839<br>(3.053)    | 2.959<br>(3.121)    | -0.003<br>(0.035)           | -0.047<br>(0.042) | -0.045<br>(0.041) | -0.028<br>(0.044)  |
|                      | High birth weight (>8.75 lbs) |                     |                     |                     | Length at birth (inches)    |                   |                   |                    |
|                      | (1)                           | (2)                 | (3)                 | (4)                 | (5)                         | (6)               | (7)               | (8)                |
| 2 <sup>nd</sup> Born | 0.043**<br>(0.017)            | 0.037*<br>(0.020)   | 0.037*<br>(0.020)   | 0.042**<br>(0.021)  | 0.194***<br>(0.072)         | 0.134*<br>(0.081) | 0.147*<br>(0.082) | 0.169**<br>(0.082) |
| 3 <sup>rd</sup> Born | 0.043<br>(0.031)              | 0.026<br>(0.042)    | 0.027<br>(0.041)    | 0.042<br>(0.042)    | 0.291**<br>(0.134)          | 0.143<br>(0.156)  | 0.158<br>(0.157)  | 0.202<br>(0.160)   |
| 4 <sup>th</sup> Born | 0.032<br>(0.058)              | 0.010<br>(0.066)    | 0.008<br>(0.065)    | 0.030<br>(0.065)    | 0.299<br>(0.230)            | 0.036<br>(0.282)  | 0.036<br>(0.283)  | 0.122<br>(0.287)   |
| Children             | 4850                          | 4850                | 4850                | 4850                | 4850                        | 4850              | 4850              | 4850               |
| Mother FE            | N                             | Y                   | Y                   | Y                   | N                           | Y                 | Y                 | Y                  |
| Maternal controls    | N                             | N                   | Y                   | Y                   | N                           | N                 | Y                 | Y                  |
| Family controls      | N                             | N                   | N                   | Y                   | N                           | N                 | N                 | Y                  |

Notes: All regressions are weighted to account for oversampling of minorities and

include mother fixed effects. Standard errors clustered at the family level are in

parentheses. \* denotes significance at 10 percent, \*\* at 5 percent, \*\*\* at 1 percent.

Sample is restricted to children with complete prenatal input information and from

non-twin families. All assessments are age-standardized scores that have been

renormalized to have a mean of 0 and a standard deviation of 1. All specifications

control for regional dummies, maternal age and its quadratic, gender of the child, age

difference with oldest and precedent sibling, age of the child at assessment, and a series of cohort dummies. Mother controls include average per capita lifetime family income and employment status year after birth (employed, unemployed, out of labor force, or in active force) and highest grade completed at the child's birth. Family controls include presence of father figure and family size measured at the time of the assessment.

Table A.4 Birth Outcomes in the 5-percent Random Sample of the National Vital Statistics

|                       | Gestational length (weeks) | Born premature       | Birth Weight (grams)   | Low Birth Weight (<2,500g) | Overweight at Birth | 5-minute Apgar Score (0-10) |
|-----------------------|----------------------------|----------------------|------------------------|----------------------------|---------------------|-----------------------------|
|                       | (1)                        | (2)                  | (3)                    | (4)                        | (5)                 | (6)                         |
| 2 <sup>nd</sup> Born  | 0.007<br>(0.005)           | -0.016***<br>(0.001) | 122.493***<br>(1.090)  | -0.027***<br>(0.000)       | 0.038***<br>(0.001) | 0.079***<br>(0.002)         |
| 3 <sup>rd</sup> Born  | 0.009<br>(0.006)           | -0.013***<br>(0.001) | 148.077***<br>(1.423)  | -0.030***<br>(0.001)       | 0.051***<br>(0.001) | 0.095***<br>(0.002)         |
| 4 <sup>th</sup> Born  | 0.004<br>(0.009)           | -0.005***<br>(0.001) | 162.636***<br>(2.192)  | -0.030***<br>(0.001)       | 0.061***<br>(0.001) | 0.102***<br>(0.003)         |
| 5 <sup>th</sup> Born  | 0.024<br>(0.016)           | -0.004<br>(0.002)    | 179.267***<br>(3.670)  | -0.029***<br>(0.001)       | 0.075***<br>(0.002) | 0.104***<br>(0.005)         |
| 6 <sup>th</sup> Born  | 0.062**<br>(0.026)         | -0.005<br>(0.004)    | 197.946***<br>(5.975)  | -0.027***<br>(0.002)       | 0.089***<br>(0.004) | 0.101***<br>(0.008)         |
| 7 <sup>th</sup> Born  | 0.151***<br>(0.039)        | -0.003<br>(0.006)    | 242.206***<br>(8.752)  | -0.035***<br>(0.003)       | 0.108***<br>(0.005) | 0.120***<br>(0.012)         |
| 8 <sup>th</sup> Born  | 0.278***<br>(0.052)        | -0.029***<br>(0.008) | 274.696***<br>(12.600) | -0.046***<br>(0.005)       | 0.119***<br>(0.008) | 0.114***<br>(0.019)         |
| 9 <sup>th</sup> Born  | 0.117<br>(0.084)           | -0.017<br>(0.012)    | 284.213***<br>(19.492) | -0.036***<br>(0.007)       | 0.119***<br>(0.011) | 0.090***<br>(0.029)         |
| 10 <sup>th</sup> Born | 0.008<br>(0.034)           | -0.009*<br>(0.005)   | 131.173***<br>(8.089)  | -0.021***<br>(0.003)       | 0.061***<br>(0.005) | 0.083***<br>(0.013)         |
| N                     | 1,422,544                  | 1,422,544            | 1,423,666              | 1,423,666                  | 1,423,666           | 1,297,506                   |
| F-stat                | 187.255                    | 137.470              | 828.359                | 154.475                    | 315.736             | 154.591                     |
| R <sup>2</sup>        | 0.030                      | 0.019                | 0.104                  | 0.029                      | 0.041               | 0.025                       |

Notes: Sample is restricted to children who were not part of multiple births, to mothers between the ages 14 to 45 and fathers between ages 14 to 60 at the time of the child's birth. All regressions control for mother and father's race, education, marital status, age at birth, and maternal weight gain during pregnancy and its squared, type of delivery (vaginal or caesarean), population size in the metropolitan area, and birth year, month, state, and resident status fixed effects. \* denotes significance at 10 percent, \*\* at 5 percent, \*\*\* at 1 percent.



Table A.5 Maternal Behavior during Pregnancy in the 5-percent Random Sample of the National Vital Statistics

|                       | Smoked during pregnancy | Number of Cigarettes (per day) | Number of Alcoholic Drinks (per week) | Used Alcohol during pregnancy | Month of 1 <sup>st</sup> Prenatal Visit | Belated Prenatal Visit (>4 <sup>th</sup> month) |
|-----------------------|-------------------------|--------------------------------|---------------------------------------|-------------------------------|-----------------------------------------|-------------------------------------------------|
|                       | (1)                     | (2)                            | (3)                                   | (4)                           | (5)                                     | (6)                                             |
| 2 <sup>nd</sup> Born  | 0.024***<br>(0.001)     | 0.363***<br>(0.009)            | -0.004***<br>(0.001)                  | -0.000<br>(0.000)             | 0.115***<br>(0.002)                     | 0.030***<br>(0.001)                             |
| 3 <sup>rd</sup> Born  | 0.041***<br>(0.001)     | 0.662***<br>(0.013)            | 0.003*<br>(0.002)                     | 0.001***<br>(0.000)           | 0.273***<br>(0.003)                     | 0.066***<br>(0.001)                             |
| 4 <sup>th</sup> Born  | 0.051***<br>(0.001)     | 0.880***<br>(0.023)            | 0.009***<br>(0.003)                   | 0.002***<br>(0.001)           | 0.447***<br>(0.006)                     | 0.112***<br>(0.002)                             |
| 5 <sup>th</sup> Born  | 0.056***<br>(0.002)     | 0.901***<br>(0.040)            | 0.008<br>(0.006)                      | 0.001<br>(0.001)              | 0.627***<br>(0.010)                     | 0.158***<br>(0.003)                             |
| 6 <sup>th</sup> Born  | 0.047***<br>(0.004)     | 0.895***<br>(0.067)            | 0.036**<br>(0.017)                    | 0.004**<br>(0.002)            | 0.798***<br>(0.018)                     | 0.198***<br>(0.004)                             |
| 7 <sup>th</sup> Born  | 0.015***<br>(0.005)     | 0.385***<br>(0.093)            | 0.019<br>(0.013)                      | 0.003<br>(0.002)              | 0.990***<br>(0.029)                     | 0.255***<br>(0.007)                             |
| 8 <sup>th</sup> Born  | 0.001<br>(0.007)        | 0.255*<br>(0.133)              | 0.061**<br>(0.028)                    | 0.004<br>(0.004)              | 1.110***<br>(0.042)                     | 0.281***<br>(0.010)                             |
| 9 <sup>th</sup> Born  | -0.020*<br>(0.011)      | -0.149<br>(0.190)              | 0.001<br>(0.015)                      | 0.005<br>(0.005)              | 1.304***<br>(0.061)                     | 0.342***<br>(0.015)                             |
| 10 <sup>th</sup> Born | -0.007*<br>(0.004)      | -0.076<br>(0.060)              | 0.000<br>(0.007)                      | 0.002<br>(0.002)              | 0.524***<br>(0.026)                     | 0.138***<br>(0.006)                             |
| N                     | 1,330,746               | 1,320,711                      | 1,382,631                             | 1,388,698                     | 1,405,740                               | 1,405,740                                       |
| F-stat                | 850.349                 | 565.297                        | 16.563                                | 62.795                        | 781.536                                 | 660.153                                         |
| R <sup>2</sup>        | 0.116                   | 0.100                          | 0.003                                 | 0.014                         | 0.110                                   | 0.095                                           |

Notes: Sample is restricted to children who were not part of multiple births, to mothers between the ages 14 to 45 and fathers between ages 14 to 60 at the time of the child's birth. All regressions control for mother and father's race, education, marital status, age at birth, and maternal weight gain during pregnancy and its squared, type of delivery (vaginal or caesarean), population size in the metropolitan area, and birth year, month, state, and resident status fixed effects. \* denotes significance at 10 percent, \*\* at 5 percent, \*\*\* at 1 percent.
